# Supplementary material
Source: PubMed Central journal article supplement (PMC7855725)
Supplement: NIHMS1652226-supplement-1.pdf [file NIHMS1652226-supplement-1.pdf]

**Supplemental Table 1.** Clinical Outcome – Eckardt Score components. Values are mean (standard deviation)

|                      | <b>No BOM N=98</b> | <b>BOM N=21</b> | <b>p-value</b> |
|----------------------|--------------------|-----------------|----------------|
| <b>Dysphagia</b>     | 1.1 (0.9)          | 2.0 (0.9)       | <0.001         |
| <b>Regurgitation</b> | 0.6 (0.7)          | 1.2 (1.0)       | 0.022          |
| <b>Chest Pain</b>    | 0.7 (0.7)          | 1.2 (1.0)       | 0.045          |
| <b>Weight Loss</b>   | 0.5 (0.9)          | 0.4 (1.0)       | 0.85           |
